# Supplementary material for: Comparative study of Cd uptake and tolerance of two Italian ryegrass (Lolium multiflorum) cultivars
Source: PeerJ. 2017 Oct 2;5:e3621. doi: 10.7717/peerj.3621 (PMC5628607; doi:10.7717/peerj.3621)
Supplement: Supplemental Information 3 — Raw data applied for Figs. 1 and 2. [file peerj-05-3621-s003.xls]

## Sheet: Cd accumulation, BCF
	cultivar	Cd treatments	root sample dry weight(g)	shoot sample dry weight(g)	root sample dry weight(g/plant)	shoot sample dry weight(g/plant)	Cd concentration in root(mg/g)	Cd concentration in medium	Root BCFs	Root BCFs(AV)	S.E.	Cd accumulation in root(g/plant)	AV(g/plant)	S.E.	Cd concentration in shoot(mg/g)	Cd accumulation in shoot(g/plant)	AV(g/plant)	S.E.	total Cd accumulation (g/plant)	AV(g/plant)	S.E.	proportion of Cd in root(%)	AV(%)	S.E.
Replicates	IdyII	CK	0.1097	0.62	0.0182833	0.103333	0.0731085	not detected				0.00133667	0.00139222	3.9374e-05	0.0106452	0.0011	0.0011351	3.66255e-05	0.00243667	0.00252733	7.5239e-05
	IdyII	CK	0.1291	0.7926	0.0215167	0.1321	0.0682417					0.00146833			0.00914711	0.00120833			0.00267667
	IdyII	CK	0.1663	0.819	0.0277167	0.1365	0.0494889					0.00137167			0.00803645	0.00109698			0.00246864
Replicates	IdyII	Cd5	0.1132	0.8388	0.0188667	0.1398	1.37809	0.00056205	2451.9	2244.83	106.874	0.026	0.0283111	0.00152237	0.116945	0.0163489	0.0139105	0.00165317	0.0423489	0.0422216	0.00210853	61.3947	67.1774	3.11234
	IdyII	Cd5	0.1522	0.7349	0.0253667	0.122483	1.2293	0.00056205	2187.18			0.0311833			0.119404	0.014625			0.0458083			68.0735
	IdyII	Cd5	0.1885	0.7862	0.0235625	0.098275	1.17772	0.00056205	2095.4			0.02775			0.109463	0.0107575			0.0385075			72.0639
Replicates	IdyII	Cd10	0.143	0.7372	0.0238333	0.122867	1.72308	0.0011241	1532.85	1407.65	72.3515	0.0410667	0.0340444	0.00416072	0.132461	0.016275	0.0190733	0.00418281	0.0573417	0.0531178	0.00652549	71.6175	64.5075	4.65267
	IdyII	Cd10	0.1011	0.5158	0.01685	0.0859667	1.58259	0.0011241	1407.87			0.0266667			0.158724	0.013645			0.0403117			66.1512
	IdyII	Cd10	0.1432	0.7976	0.0238667	0.132933	1.44134	0.0011241	1282.22			0.0344			0.205366	0.0273			0.0617			55.7536
Replicates	IdyII	Cd25	0.1182	0.314	0.0197	0.0785	3.59312	0.00281025	1278.58	1198.43	89.9748	0.0707845	0.0594004	0.00709116	0.246624	0.01936	0.0284283	0.00459238	0.0901445	0.0878287	0.0050914	78.5234	67.3324	5.75554
	IdyII	Cd25	0.0972	0.4808	0.0162	0.1202	2.86317	0.00281025	1018.83			0.0463833			0.263727	0.0317			0.0780833			59.4023
	IdyII	Cd25	0.1004	0.4432	0.0167333	0.1108	3.64741	0.00281025	1297.9			0.0610333			0.30889	0.034225			0.0952583			64.0714
Replicates	IdyII	Cd50	0.0982	0.5826	0.0163667	0.0971	5.15841	0.0056205	917.784	881.863	102.911	0.0844259	0.0658475	0.0105809	0.494	0.0479674	0.0397669	0.00612598	0.132393	0.105614	0.0133993	63.769	62.0831	5.22002
	IdyII	Cd50	0.0741	0.4469	0.01235	0.0744833	3.8691	0.0056205	688.39			0.0477833			0.584695	0.04355			0.0913333			52.3175
	IdyII	Cd50	0.0671	0.4192	0.0111833	0.0698667	5.84203	0.0056205	1039.41			0.0653333			0.397662	0.0277833			0.0931167			70.1629
Replicates	IdyII	Cd100	0.043	0.4103	0.01075	0.0683833	7.08605	0.011241	630.375	613.288	40.6018	0.076175	0.0665083	0.0113001	0.81282	0.0555833	0.0548326	0.0090675	0.131758	0.121341	0.0199654	57.8142	54.6832	1.56562
	IdyII	Cd100	0.0629	0.5603	0.0104833	0.09365	7.57075	0.011241	673.494			0.0793667			0.749056	0.0701491			0.149516			53.0825
	IdyII	Cd100	0.0438	0.4332	0.0073	0.0722	6.02511	0.011241	535.994			0.0439833			0.536915	0.0387652			0.0827486			53.153
Replicates	Harukaze	CK	0.0584	0.336	0.0146	0.084	0.0450342	not detected				0.0006575	0.0007625	7.48888e-05	0.00803571	0.000675	0.000641667	6.00925e-05	0.0013325	0.00140417	3.6094e-05	49.3433	54.2026	4.57706
	Harukaze	CK	0.0561	0.371	0.014025	0.09275	0.0515152					0.0007225			0.00781671	0.000725			0.0014475			49.9136
	Harukaze	CK	0.069	0.301	0.01725	0.07525	0.0526087					0.0009075			0.00697674	0.000525			0.0014325			63.3508
Replicates	Harukaze	Cd5	0.083	0.4098	0.0138333	0.0683	2.77831	0.00056205	4943.18	3714.6	626.398	0.0384333	0.0303833	0.00456808	0.139556	0.00953167	0.00828944	0.00107985	0.047965	0.0386728	0.00555426	80.1279	78.4581	1.0249
	Harukaze	Cd5	0.0836	0.3767	0.0139333	0.0627833	1.62321	0.00056205	2888.01			0.0226167			0.0977701	0.00613833			0.028755			78.653
	Harukaze	Cd5	0.097	0.4374	0.0161667	0.0729	1.86186	0.00056205	3312.62			0.0301			0.126177	0.00919833			0.0392983			76.5936
Replicates	Harukaze	Cd10	0.063	0.3439	0.0105	0.0573167	3.1381	0.0011241	2791.65	2428.03	237.002	0.03295	0.0331694	0.00277586	0.174818	0.01002	0.0120831	0.0010568	0.04297	0.0452525	0.00278821	76.6814	73.1555	2.71432
	Harukaze	Cd10	0.081	0.3771	0.0135	0.06285	2.82099	0.0011241	2509.55			0.0380833			0.202334	0.0127167			0.0508			74.9672
	Harukaze	Cd10	0.1022	0.5592	0.012775	0.0699	2.22896	0.0011241	1982.89			0.028475			0.193312	0.0135125			0.0419875			67.8178
Replicates	Harukaze	Cd25	0.05	0.2946	0.00833333	0.0491	4.472	0.00281025	1591.32	1405.69	95.1074	0.0372667	0.0379611	0.00127506	0.326748	0.0160433	0.0185978	0.00163153	0.05331	0.0565589	0.00163818	69.9056	67.1821	2.31259
	Harukaze	Cd25	0.0605	0.3717	0.0100833	0.06195	3.58843	0.00281025	1276.91			0.0361833			0.349206	0.0216333			0.0578167			62.5829
	Harukaze	Cd25	0.064	0.3248	0.0106667	0.0541333	3.79062	0.00281025	1348.86			0.0404333			0.334667	0.0181167			0.05855			69.0578
Replicates	Harukaze	Cd50	0.027	0.1755	0.0045	0.02925	7.35185	0.0056205	1308.04	1356.84	29.024	0.0330833	0.0417	0.00474852	0.500627	0.0146433	0.0244614	0.00491194	0.0477267	0.0661614	0.00939691	69.3183	63.7401	3.02484
	Harukaze	Cd50	0.039	0.2076	0.0065	0.0346	7.61026	0.0056205	1354.02			0.0494667			0.840418	0.0290785			0.0785451			62.9787
	Harukaze	Cd50	0.043	0.334	0.005375	0.04175	7.91628	0.0056205	1408.47			0.04255			0.710479	0.0296625			0.0722125			58.9233
Replicates	Harukaze	Cd100	0.0299	0.2273	0.00299	0.0284125	10.6221	0.011241	944.94	879.698	67.7669	0.03176	0.0316917	0.00175982	1.24065	0.03525	0.0382266	0.00274019	0.06701	0.0699183	0.00431281	47.3959	45.3756	1.01187
	Harukaze	Cd100	0.0325	0.2592	0.00325	0.0324	10.6785	0.011241	949.958			0.0347051			1.34877	0.0437			0.0784051			44.2638
	Harukaze	Cd100	0.0342	0.2227	0.00342	0.0280375	8.3655	0.011241	744.195			0.02861			1.27436	0.0357299			0.0643399			44.467
		Ck,Cd concentration 0 µM
		Cd5,Cd concentration 5µM
		Cd10,Cd concentration 10µM
		Cd25,Cd concentration 25µM
		Cd50,Cd concentration 5µM
		Cd100,Cd concentration 100µM

## Sheet: Cd concentrations in plant 
cultivar	repelicates	treatments	root sample dry weight(g)	shoot sample dry weight(g)	Cd concentration of root（mg/L)	Cd concentration of shoot（mg/L)	Cd concentration in root（mg/kg)	AV（mg/kg)	S.E.	Cd concentration in shoot（mg/kg)	AV（mg/kg)	S.E.	TFs of Cd	AV(TFs)	S.E.
IdyII	1	CK	0.1097	0.62	0.802	0.66	73.1085	63.613	7.20046	10.6452	9.27624	0.755832	0.145608
IdyII	2	CK	0.1291	0.7926	0.881	0.725	68.2417			9.14711			0.13404
IdyII	3	CK	0.1663	0.4828	0.823	0.388	49.4889			8.03645			0.162389
IdyII	1	Cd5	0.1132	0.5388	1.56	6.301	1378.09	1261.7	60.0686	116.945	115.271	2.98927	0.0848601	0.0916456	0.00360152
IdyII	2	Cd5	0.1522	0.7349	1.871	8.775	1229.3			119.404			0.0971314
IdyII	3	Cd5	0.1885	0.7862	2.22	8.606	1177.72			109.463			0.0929451
IdyII	1	Cd10	0.143	0.7372	2.464	9.765	1723.08	1582.34	81.3303	132.461	144.621	7.64365	0.0768745	0.0920527	0.00759846
IdyII	2	Cd10	0.1011	0.5158	1.6	8.187	1582.59			158.724			0.100294
IdyII	3	Cd10	0.1432	0.7976	2.064	11.38	1441.34			142.678			0.0989898
IdyII	1	Cd25	0.0843	0.314	3.639	7.744	4316.73	3609.1	420.043	246.624	273.08	18.573	0.0571322	0.0779766	0.0106402
IdyII	2	Cd25	0.0972	0.4808	2.783	12.68	2863.17			263.727			0.0921102
IdyII	3	Cd25	0.1004	0.4432	3.662	13.69	3647.41			308.89			0.0846875
IdyII	1	Cd50	0.0928	0.3	4.787	14.82	5158.41	4907.09	319.455	494	431.956	34.7513	0.095766	0.0880564	0.00429616
IdyII	2	Cd50	0.0741	0.4469	3.92	19.13	5290.15			428.06			0.0809164
IdyII	3	Cd50	0.0671	0.4192	2.867	15.67	4272.73			373.807			0.0874868
IdyII	1	Cd100	0.043	0.4103	3.047	33.35	7086.05	6893.97	456.405	812.82	699.597	83.3977	0.114707	0.10092	0.00745444
IdyII	2	Cd100	0.0629	0.6619	4.762	49.58	7570.75			749.056			0.0989408
IdyII	3	Cd100	0.0438	0.3332	2.639	17.89	6025.11			536.915			0.0891128
Harukaze	1	CK	0.0584	0.336	0.263	0.27	45.0342	49.7194	2.36373	8.03571	7.60972	0.322742	0.178436
Harukaze	2	CK	0.0561	0.371	0.289	0.29	51.5152			7.81671			0.151736
Harukaze	3	CK	0.069	0.301	0.363	0.21	52.6087			6.97674			0.132616
Harukaze	1	Cd5	0.083	0.4098	2.306	5.719	2778.31	2087.79	352.067	139.556	121.168	12.3198	0.0502304	0.059411	0.0050798
Harukaze	2	Cd5	0.0836	0.3767	1.357	3.683	1623.21			97.7701			0.0602327
Harukaze	3	Cd5	0.097	0.4374	1.806	5.519	1861.86			126.177			0.0677697
Harukaze	1	Cd10	0.063	0.3439	1.977	6.012	3138.1	2729.35	266.414	174.818	190.155	8.09835	0.0557084	0.0713867	0.00895597
Harukaze	2	Cd10	0.081	0.3771	2.285	7.63	2820.99			202.334			0.0717244
Harukaze	3	Cd10	0.1022	0.5592	2.278	10.81	2228.96			193.312			0.0867273
Harukaze	1	Cd25	0.05	0.2946	2.236	9.626	4472	3950.35	267.275	326.748	336.874	6.57633	0.0730653	0.0862227	0.00707592
Harukaze	2	Cd25	0.0605	0.3717	2.171	12.98	3588.43			349.206			0.0973145
Harukaze	3	Cd25	0.064	0.3248	2.426	10.87	3790.63			334.667			0.0882882
Harukaze	1	Cd50	0.027	0.1755	1.985	15.786	7351.85	7626.13	163.129	899.487	816.795	55.8258	0.122348	0.10751	0.00952336
Harukaze	2	Cd50	0.039	0.2776	2.968	23.33	7610.26			840.418			0.110432
Harukaze	3	Cd50	0.043	0.334	3.404	23.73	7916.28			710.479			0.0897491
Harukaze	1	Cd100	0.0299	0.2273	3.176	28.2	10622.1	9888.68	761.767	1240.65	1287.93	31.9384	0.116799	0.131814	0.0106214
Harukaze	2	Cd100	0.0395	0.2592	4.218	34.96	10678.5			1348.77			0.126307
Harukaze	3	Cd100	0.0342	0.2227	2.861	28.38	8365.5			1274.36			0.152335
	The sample were digested and the final volume is 10 ml.
	Ck,Cd concentration 0 µM
	Cd5,Cd concentration 5µM
	Cd10,Cd concentration 10µM
	Cd25,Cd concentration 25µM
	Cd50,Cd concentration 5µM
	Cd100,Cd concentration 100µM
	AV- average value
			1	1.37809
			1	1.2293
			1	1.17772
			2	1.72308
			2	1.58259
			2	1.44134
			3	3.59312
			3	2.86317
			3	3.64741
			4	5.15841
			4	3.303
			4	3.7512
			5	7.08605
			5	7.57075
			5	6.02511
			6	2.77831
			6	1.62321
			6	1.86186
			7	3.1381
			7	2.82099
			7	2.22896
			8	4.472
			8	3.58843
			8	3.79062
			9	7.35185
			9	7.61026
			9	7.91628
			10	10.6221
			10	10.6785
			10	8.3655
					a. 使用调和均值样本大小 = 3.000。
					b. Alpha = .05。
										地上部镉浓度
										处理序号		N	子集
序号			处理	根系镉浓度均值	MSE								1	2	3
1			CK	0.063613	0.00720046		g			Tukey HSDa,b	7	3	0.0076
2			Cd5	1.2617	0.0600686		f				1	3	0.00923333
3			Cd10	1.58234	0.0813303		f				2	3	0.115267	0.115267
4			Cd25	3.3679	0.252852		cd				8	3	0.1212	0.1212	0.1212
5			Cd50	4.07087	0.558951		c				3	3	0.165533	0.165533	0.165533
6			Cd100	6.89397	0.456405		b				9	3	0.190133	0.190133	0.190133
7			CK	0.0497194	0.00236373		g				4	3		0.273067	0.273067
8			Cd5	2.08779	0.352067		ef				10	3			0.336867
9			Cd10	2.72935	0.266414		de				5	3
10			Cd25	3.95035	0.267275		c				11	3
11			Cd50	7.62613	0.163129		b				6	3
12			Cd100	9.88868	0.761767		a				12	3
											Sig.		0.159573	0.321912	0.0527009
序号			处理	地上镉浓度均值	MSE			TF转运系数均值		Duncana,b	7	3	0.0076
1			CK-1	0.00927624	0.000755832		f	0.147346			1	3	0.00923333
2			Cd5-1	0.115271	0.00298927		ef	0.0916456			2	3	0.115267	0.115267
3			Cd10-1	0.165517	0.0213183		de	0.10655			8	3	0.1212	0.1212
4			Cd25-1	0.27308	0.018573		cd	0.0818119			3	3		0.165533	0.165533
5			Cd50-1	0.342385	0.0444828		c	0.0896304			9	3		0.190133	0.190133
6			Cd100-1	0.699597	0.0833977		b	0.10092			4	3			0.273067
7			CK1	0.00760972	0.000322742		f	0.154263			10	3
8			Cd5-1	0.121168	0.0123198		ef	0.059411			5	3
9			Cd10-1	0.190155	0.00809835		de	0.0713867			11	3
10			Cd25-1	0.336874	0.00657633		c	0.0862227			6	3
11			Cd50-1	0.683841	0.0989894		b	0.0894256			12	3
12			Cd100-1	1.28793	0.0319384		a	0.131814			Sig.		0.0955921	0.267177	0.103187
										已显示同类子集中的组均值。 基于观测到的均值。 误差项为均值方 (错误) = .005。
										a. 使用调和均值样本大小 = 3.000。
										b. Alpha = .05。
已显示同类子集中的组均值。 基于观测到的均值。 误差项为均值方 (错误) = .007。
a. 使用调和均值样本大小 = 3.000。
b. Alpha = .05。
					地上部镉浓度
					处理			N		子集
										1	2	3	4	5	6
					Duncana,b		7	3		0.0076
							1	3		0.00923333
							2	3		0.115267	0.115267
							8	3		0.1212	0.1212
							3	3			0.165533	0.165533
							9	3			0.190133	0.190133
							4	3				0.273067	0.273067
							10	3					0.336867
							5	3					0.3424
							11	3						0.683833
							6	3						0.6996
							12	3							1.28797
							Sig.			0.0886983	0.256856	0.0960397	0.277484	0.791273	1
					已显示同类子集中的组均值。 基于观测到的均值。 误差项为均值方 (错误) = .005。
					a. 使用调和均值样本大小 = 3.000。
					b. Alpha = .05。
转运系数
处理			N	子集
				1	2		3	chuli		xuhao
Duncana,b			3	0.0593333				bc		1
			3	0.0716667	0.0716667			ab		2
			3	0.082	0.082			bc		3
			3	0.086	0.086			bc		4
			3	0.0893333	0.0893333			ab		5
			3	0.0896667	0.0896667			c		6
			3	0.0916667	0.0916667			bc		7
			3		0.101		0.101	bc		8
			3		0.106333		0.106333	bc		9
			3				0.131667	a		10
				0.0937721	0.0757722		0.0869131
已显示同类子集中的组均值。 基于观测到的均值。 误差项为均值方 (错误) = .000。
a. 使用调和均值样本大小 = 3.000。
b. Alpha = .05。
