# Supplementary material for: Comparative study of Cd uptake and tolerance of two Italian ryegrass (Lolium multiflorum) cultivars
Source: PeerJ. 2017 Oct 2;5:e3621. doi: 10.7717/peerj.3621 (PMC5628607; doi:10.7717/peerj.3621)
Supplement: Supplemental Information 4 — Raw data applied for data analyses of metal uptake and preparation for Fig. 3. [file peerj-05-3621-s004.xls]

## Sheet: metal uptake 
No.	cultivar	replicates	treatments	root sample weight（g)	zn concentration(mg/L)	Fe concentration(mg/L)	Mn concentration (mg/L)	Mg concentration(mg/L)
1	IdyII	1	CK	0.1097	0.914	5.462	0.47	7.995
2	IdyII	2	CK	0.1291	1.211	6.646	0.406	10.36
3	IdyII	3	CK	0.1663	1.555	8.865	0.343	11.77
4	IdyII	1	Cd5	0.1132	0.147	0.351	0.028	0.839
5	IdyII	2	Cd5	0.1522	0.102	0.313	0.031	1.042
6	IdyII	3	Cd5	0.1885	0.124	0.292	0.034	1.302
7	IdyII	1	Cd10	0.143	0.12	0.342	0.022	0.723
8	IdyII	2	Cd10	0.1011	0.099	0.31	0.03	0.679
9	IdyII	3	Cd10	0.1432	0.094	0.504	0.034	0.778
10	IdyII	1	Cd25	0.0843	0.151	0.408	0.031	0.819
11	IdyII	2	Cd25	0.0972	0.133	0.408	0.025	0.608
12	IdyII	3	Cd25	0.1004	0.142	0.519	0.027	0.68
13	IdyII	1	Cd50	0.0928	0.151	0.579	0.034	0.768
14	IdyII	2	Cd50	0.0741	0.131	0.361	0.023	0.563
15	IdyII	3	Cd50	0.0671	0.202	0.316	0.018	0.548
16	IdyII	1	Cd100	0.043	0.142	0.296	0.018	0.469
17	IdyII	2	Cd100	0.0629	0.185	0.29	0.017	0.512
18	IdyII	3	Cd100	0.0438	0.148	0.261	0.014	0.345
34	Harukaze	1	CK	0.0584	1.12	0.915	0.229	4.919
35	Harukaze	2	CK	0.0561	1.045	1.35	0.327	3.895
36	Harukaze	3	CK	0.069	0.948	1.906	0.229	3.704
19	Harukaze	1	Cd5	0.083	0.121	0.207	0.016	0.648
20	Harukaze	2	Cd5	0.0836	0.132	0.265	0.017	0.84
21	Harukaze	3	Cd5	0.097	0.117	0.353	0.017	0.81
22	Harukaze	1	Cd10	0.063	0.123	0.47	0.021	0.472
23	Harukaze	2	Cd10	0.081	0.119	0.436	0.017	0.706
24	Harukaze	3	Cd10	0.1022	0.103	0.398	0.018	0.56
25	Harukaze	1	Cd25	0.05	0.125	0.354	0.016	0.414
26	Harukaze	2	Cd25	0.0605	0.202	0.3	0.016	0.541
27	Harukaze	3	Cd25	0.064	0.446	0.527	0.026	0.578
28	Harukaze	1	Cd50	0.027	0.151	0.317	0.018	0.225
29	Harukaze	2	Cd50	0.039	0.21	0.419	0.016	0.281
30	Harukaze	3	Cd50	0.043	0.173	0.37	0.017	0.366
31	Harukaze	1	Cd100	0.0299	0.207	0.556	0.029	0.224
32	Harukaze	2	Cd100	0.0395	0.188	0.313	0.025	0.774
33	Harukaze	3	Cd100	0.0342	0.168	0.388	0.025	0.554
No.	cultivar	replicates	treatments	shoot sample weight（g)	zn concentration(mg/L)	Fe concentration(mg/L)	Mn concentration (mg/L)	Mg concentration(mg/L)
1	IdyII	1	CK	0.62	6.938	4.602	5.522	168.8
2	IdyII	2	CK	0.7926	9.161	6.36	6.515	234.2
3	IdyII	3	CK	0.4828	6.904	4.115	5.544	154.5
4	IdyII	1	Cd5	0.5388	0.689	0.44	0.224	14.42
5	IdyII	2	Cd5	0.7349	0.731	0.589	0.251	19.75
6	IdyII	3	Cd5	0.7862	0.679	0.616	0.276	22.53
7	IdyII	1	Cd10	0.7372	0.864	0.6	0.261	17.85
8	IdyII	2	Cd10	0.5158	0.536	0.41	0.195	13.54
9	IdyII	3	Cd10	0.7976	0.765	0.538	0.279	20.85
10	IdyII	1	Cd25	0.314	0.56	0.314	0.253	13.72
11	IdyII	2	Cd25	0.4808	0.448	0.172	0.205	10.51
12	IdyII	3	Cd25	0.4432	0.404	0.239	0.105	10.54
13	IdyII	1	Cd50	0.3	0.305	0.182	0.121	8.513
14	IdyII	2	Cd50	0.4469	0.412	0.211	0.201	11.24
15	IdyII	3	Cd50	0.4192	0.457	0.171	0.219	10.8
16	IdyII	1	Cd100	0.4103	0.47	0.115	0.182	8.488
17	IdyII	2	Cd100	0.6619	0.625	0.239	0.284	14.55
18	IdyII	3	Cd100	0.3332	0.482	0.226	0.151	10.791
34	Harukaze	1	CK	0.336	2.976	1.805	2.92	81.59
35	Harukaze	2	CK	0.371	3.343	1.691	2.619	93.11
36	Harukaze	3	CK	0.301	3.068	1.83	2.903	86.88
19	Harukaze	1	Cd5	0.4098	0.5	0.356	0.176	13.64
20	Harukaze	2	Cd5	0.3767	0.388	0.373	0.159	11.67
21	Harukaze	3	Cd5	0.4374	0.458	0.317	0.188	11.34
22	Harukaze	1	Cd10	0.3439	0.362	0.205	0.157	9.794
23	Harukaze	2	Cd10	0.3771	0.448	0.327	0.142	11
24	Harukaze	3	Cd10	0.5592	0.471	0.407	0.185	16.37
25	Harukaze	1	Cd25	0.2946	0.319	0.153	0.13	8.374
26	Harukaze	2	Cd25	0.3717	0.293	0.237	0.131	10.37
27	Harukaze	3	Cd25	0.3248	0.36	0.205	0.157	10
28	Harukaze	1	Cd50	0.1755	0.169	0.064	0.108	4.551
29	Harukaze	2	Cd50	0.2776	0.287	0.182	0.164	7.94
30	Harukaze	3	Cd50	0.334	0.265	0.257	0.14	9.296
31	Harukaze	1	Cd100	0.2273	0.205	0.079	0.136	6.655
32	Harukaze	2	Cd100	0.2592	0.194	0.087	0.129	6.533
33	Harukaze	3	Cd100	0.2227	0.159	0.095	0.124	6.504
	Ck,Cd concentration 0 µM
	Cd5,Cd concentration 5µM
	Cd10,Cd concentration 10µM
	Cd25,Cd concentration 25µM
	Cd50,Cd concentration 5µM
	Cd100,Cd concentration 100µM
samples were digested and samples solution were 10ml. Then the samples were diluted 10 times except for CK.
