# Supplementary material for: Comparative study of Cd uptake and tolerance of two Italian ryegrass (Lolium multiflorum) cultivars
Source: PeerJ. 2017 Oct 2;5:e3621. doi: 10.7717/peerj.3621 (PMC5628607; doi:10.7717/peerj.3621)
Supplement: Supplemental Information 5 — Raw data applied for data analyses of Pigment content and preparation for Table 3. [file peerj-05-3621-s005.xls]

## Sheet: photosynthetic pigment contents
cultivar	replicates	treatment	leaf sample weight(g)/Fresh	A665	A649	A470
IdyII	1	CK	0.116	1.245	0.532	1.055
IdyII	2	CK	0.111	1.07	0.46	0.91
IdyII	3	CK	0.117	1.133	0.486	0.954
IdyII	1	Cd5	0.105	1.081	0.468	0.937
IdyII	2	Cd5	0.108	1.012	0.432	0.843
IdyII	3	Cd5	0.117	1.005	0.434	0.789
IdyII	1	Cd10	0.11	0.889	0.383	0.751
IdyII	2	Cd10	0.121	0.895	0.396	0.773
IdyII	3	Cd10	0.115	1.274	0.553	1.119
IdyII	1	Cd25	0.114	0.994	0.434	0.978
IdyII	2	Cd25	0.122	1.064	0.485	0.942
IdyII	3	Cd25	0.119	1.128	0.477	0.792
IdyII	1	Cd50	0.116	0.897	0.388	0.744
IdyII	2	Cd50	0.118	0.909	0.387	0.738
IdyII	3	Cd50	0.107	0.853	0.378	0.769
IdyII	1	Cd100	0.122	0.682	0.294	0.64
IdyII	2	Cd100	0.127	0.68	0.302	0.644
IdyII	3	Cd100	0.125	0.643	0.299	0.583
Harukaze	1	CK	0.119	1.169	0.509	0.998
Harukaze	2	CK	0.114	1.373	0.585	1.184
Harukaze	3	CK	0.121	1.35	0.587	1.195
Harukaze	1	Cd5	0.131	1.383	0.594	1.202
Harukaze	2	Cd5	0.128	1.49	0.647	1.283
Harukaze	3	Cd5	0.135	1.488	0.641	1.287
Harukaze	1	Cd10	0.11	0.814	0.344	0.65
Harukaze	2	Cd10	0.12	1.098	0.467	0.897
Harukaze	3	Cd10	0.122	1.142	0.489	0.937
Harukaze	1	Cd25	0.136	0.77	0.327	0.665
Harukaze	2	Cd25	0.12	0.76	0.326	0.647
Harukaze	3	Cd25	0.11	0.738	0.315	0.637
Harukaze	1	Cd50	0.109	0.562	0.251	0.506
Harukaze	2	Cd50	0.118	0.387	0.172	0.329
Harukaze	3	Cd50	0.119	0.564	0.254	0.509
Harukaze	1	Cd100	0.12	0.263	0.116	0.212
Harukaze	2	Cd100	0.129	0.146	0.07	0.127
Harukaze	3	Cd100	0.131	0.333	0.148	0.288
		Ck,Cd concentration 0 µM
		Cd5,Cd concentration 5µM
		Cd10,Cd concentration 10µM
		Cd25,Cd concentration 25µM
		Cd50,Cd concentration 5µM
		Cd100,Cd concentration 100µM
