# Supplementary material for: Comparative study of Cd uptake and tolerance of two Italian ryegrass (Lolium multiflorum) cultivars
Source: PeerJ. 2017 Oct 2;5:e3621. doi: 10.7717/peerj.3621 (PMC5628607; doi:10.7717/peerj.3621)
Supplement: Supplemental Information 6 — Raw data applied for data analyses of correlation among root Tls, Cd uptake in root, TFs, MDA content of root, NPT content of root and preparation for Table 4. [file peerj-05-3621-s006.xls]

## Sheet: correlation analysis
cultivar	replicates	treatments	TI(root）	Cd concentration in roo(mg/g)	TFs	Cd accumulation in root(mg/plant)	MDA content of root	NPT content of root
IdyII	1	Cd5	0.838312	1.37809	0.0848601	0.026	7.24248	0.391501
IdyII	2	Cd5	1.12713	1.2293	0.0971314	0.0311833	10.9403	0.994812
IdyII	3	Cd5	1.04696	1.17772	0.0929451	0.02775	8.20594	0.988916
IdyII	1	Cd10	1.059	1.72308	0.0768745	0.0410667	12.2761	1.68197
IdyII	2	Cd10	0.748704	1.58259	0.100294	0.0266667	12.8177	1.71489
IdyII	3	Cd10	1.06048	1.44134	0.0989898	0.0344	17.1275	0.912401
IdyII	1	Cd25	0.875339	3.59312	0.0571322	0.0707845	17.9011	1.61199
IdyII	2	Cd25	0.719822	2.86317	0.0921102	0.0463833	10.9403	0.928083
IdyII	3	Cd25	0.74352	3.64741	0.0846875	0.0610333	15.8719	1.88593
IdyII	1	Cd50	0.727228	5.15841	0.095766	0.0844259	19.698	3.3617
IdyII	2	Cd50	0.548753	3.8691	0.0809164	0.0477833	16.036	2.62579
IdyII	3	Cd50	0.496914	5.84203	0.0874868	0.0653333	13.4548	2.45136
IdyII	1	Cd100	0.444335	7.08605	0.114707	0.076175	30.4348	1.87538
IdyII	2	Cd100	0.465811	7.57075	0.0989408	0.0793667	20.3303	2.70933
IdyII	3	Cd100	0.324364	6.02511	0.0891128	0.0439833	21.9859	2.44097
Harukaze	1	Cd5	0.904632	2.77831	0.0502304	0.0384333	6.02592	0.329042
Harukaze	2	Cd5	0.911172	1.62321	0.0602327	0.0226167	14.2589	0.840579
Harukaze	3	Cd5	1.05722	1.86186	0.0677697	0.0301	7.11037	0.718053
Harukaze	1	Cd10	0.686649	3.1381	0.0557084	0.03295	11.1724	0.905399
Harukaze	2	Cd10	0.882834	2.82099	0.0717244	0.0380833	16.2087	0.390703
Harukaze	3	Cd10	0.835422	2.22896	0.0867273	0.028475	18.2582	0.645765
Harukaze	1	Cd25	0.544959	4.472	0.0730653	0.0372667	28.163	0.658473
Harukaze	2	Cd25	0.659401	3.58843	0.0973145	0.0361833	10.1247	0.502819
Harukaze	3	Cd25	0.697548	3.79062	0.0882882	0.0404333	24.2547	0.671181
Harukaze	1	Cd50	0.294278	7.35185	0.122348	0.0330833	35.5625	0.636931
Harukaze	2	Cd50	0.425068	7.61026	0.110432	0.0494667	34.7415	0.663007
Harukaze	3	Cd50	0.351499	7.91628	0.0897491	0.04255	30.0146	0.644013
Harukaze	1	Cd100	0.195531	10.6221	0.116799	0.03176	45.4251	0.756871
Harukaze	2	Cd100	0.212534	10.6785	0.126307	0.0347051	31.215	1.16104
Harukaze	3	Cd100	0.223651	8.3655	0.152335	0.02861	49.951	0.708053
